# Supplementary material
Source: Springer Nature journal article supplement (https://www.springermedizin.de/resource/supplementary/13054_2006_4636_MOESM3_ESM.pdf/9723392)
Supplement: MOESM3 [file 9723392]

| Furosemide           | inter pts (N) | cont pts (N) | inter age       | cont age        | p-value | inter dose mg/kg.24 hrs | cont dose mg/kg.24 hrs | p-value | inter UO ml/kg.hr | cont UO ml/kg.hr | p-value | inter UO/variance ml/kg.hr | cont UO/variance ml/kg.hr | p-value  |
|----------------------|---------------|--------------|-----------------|-----------------|---------|-------------------------|------------------------|---------|-------------------|------------------|---------|----------------------------|---------------------------|----------|
| Singh (1992)         | 12            | 8            | 1.44 (± 1.4) yr | 2.3 (± 2.2) yr  | NS      | 6.23 (± 0.62)           | 4.9 (±1.78)            | 0.045   | 3.53 (±4.1)       | 3.36 (± 1.79)    | NS      | 13.07 (± 14.56)            | 2.19 (± 1.92)             | 0.045    |
| prospective RCT      |               |              |                 |                 |         |                         |                        |         |                   |                  |         | ml/kg.hr                   | ml/kg.hr                  |          |
| 24 hrs               |               |              |                 |                 |         |                         |                        |         |                   |                  |         |                            |                           |          |
| Luciani (1997)       | 15            | 11           | 3.7 (± 3.4) m   | 1.8 (± 2.5) m   | 0.1     | 6.8 (± 1.2)             | 2.5 (± 0.3)            | 0.001   | 3.3 (± 1.1)       | 2.5 (± 1.1)      | 0.05    | 3.8 (±2.1)                 | 1.9 (±1.6)                | 0.02     |
| prospective RCT      |               |              |                 |                 |         |                         |                        |         |                   |                  |         |                            |                           |          |
| 24 hrs               |               |              |                 |                 |         |                         |                        |         |                   |                  |         |                            |                           |          |
| Klinge (1997)        | 23            | 23           | 2.4 (± 2.1 )yr  | 3.4 (± 3.1 ) yr | NS      | day 1                   | day 1                  | day 1   | day 1             | day 1            | day 1   | 15.8 (± 3.7) (max)         | 9.4 (± 4.1) (max)         | < 0.0001 |
| prospective RCT      |               |              |                 |                 |         | 1.6 (± 0.6)             | 2.1 (± 0.7)            | 0.014   | 3.1 (± 0.8)       | 2.7 (± 0.8)      | NS      | ml/kg.hr                   | ml/kg.hr                  |          |
| 72 hrs               |               |              |                 |                 |         | day 2                   | day 2                  | day 2   | day 2             | day 2            | day 2   | 0.3 (± 0.2) (min)          | 0.5 (± 0.3) (min)         | NS       |
|                      |               |              |                 |                 |         | 0.9 (± 0.5)             | 1.7 (± 0.6)            | 0.0003  | 2.9 (± 1.1)       | 2.9 (± 0.9)      | NS      | ml/kg.hr                   | ml/kg.hr                  |          |
|                      |               |              |                 |                 |         | day 3                   | day 3                  | day 3   | day 3             | day 3            | day 3   |                            |                           |          |
|                      |               |              |                 |                 |         | 1.0 (± 0.5)             | 1.7 (± 1.0)            | 0.014   | 2.9 (± 1.0)       | 3.6 (± 1.1)      | NS      |                            |                           |          |
| van der Vorst (2001) |               | 12           |                 | median          |         |                         | day 1                  |         |                   | day 1            |         |                            |                           |          |
| observational study  |               |              |                 | 13 (0-33) wks   |         |                         | 2.2 (± 0.4)            |         |                   | 2.4 (0.6-5.2)    |         |                            |                           |          |
| 72 hrs               |               |              |                 |                 |         |                         | day 2                  |         |                   | day 2            |         |                            |                           |          |
|                      |               |              |                 |                 |         |                         | 4.2 (± 1.1)            |         |                   | 5.8 (3.5-9.1)    |         |                            |                           |          |
|                      |               |              |                 |                 |         |                         | day 3                  |         |                   | day 3            |         |                            |                           |          |
|                      |               |              |                 |                 |         |                         | 3.6 (± 1.3)            |         |                   | 5.4 (3.6-7.4)    |         |                            |                           |          |

data given as mean (sd); unless indicated otherwise

RCT: randomized controlled trial

inter:intermittent; cont:continuous; UO:urine output
